# Supplementary material
Source: MDPI journal article supplement (https://www.mdpi.com/2073-4395/13/3/900)
Supplement: s1 [file s1]

Table S1. Activities of acid and alkaline phosphatase (acP and alP) and dehydrogenase (DH) in 0 to 20 cm soil depth of the six studied treatments (no P, TSP, ash, manure, compost and compost+TSP) with cultivation of selected accessions of alfalfa and red clover in autumn 2020. Letters in capital case indicate significant difference between treatments and letters in lower case indicate significant difference between accessions within same plant species (Duncan's new multiple range test with  $p < 0.05$ ). Mean  $\pm$  standard deviation ( $n = 4$ ).

| Enzyme     | Plant species | Accession      | Treatment      |                |                |                |                |                |                |
|------------|---------------|----------------|----------------|----------------|----------------|----------------|----------------|----------------|----------------|
|            |               |                | No P           |                | TSP            |                | Ash            | Manure         | Compost        |
| alP        | Alfalfa       | LE2812         | 36.5±21.7 Aa   | 31.9± 6.0 Aa   | 38.0±10.5 Aa   | 53.0±26.0 Aa   | 52.1±10.6 Aa   | 45.0±16.8 Aa   |                |
|            |               | LE2368         | 34.4±16.4 ABa  | 32.5± 7.8 Ba   | 38.7± 7.0 ABa  | 49.1±16.7 Aa   | 48.8± 6.5 Aa   | 46.3±17.6 ABa  |                |
|            |               | LE888          | 32.3±17.0 Ca   | 34.6± 8.6 BCa  | 36.7± 7.2 ABCa | 46.8±18.3 ABCa | 52.1±15.1 Aa   | 49.7±10.7 ABa  |                |
|            |               | Average        | 34.4±16.8 B    | 33.0± 6.9 B    | 37.8± 7.6 AB   | 49.3±18.1 A    | 51.0±10.3 A    | 47.0±14.1 AB   |                |
|            | Red clover    | LE1731         | 24.1±12.4 Ba   | 28.5±10.5 Bb   | 26.0±14.0 Bb   | 50.4±14.0 Aa   | 52.5± 9.9 Aa   | 44.7±11.4 Aa   |                |
|            |               | LE1423         | 28.5±11.2 Ca   | 36.5± 5.4 BCa  | 35.7± 8.9 BCa  | 45.4±15.0 Ba   | 61.4±14.2 Aa   | 61.6±15.7 Aa   |                |
|            |               | LE1937         | 34.5±19.8 Ba   | 33.6± 6.6 Bab  | 33.7±10.5 Bab  | 45.1±11.1 ABa  | 51.1±12.0 Aa   | 49.5± 9.8 Aa   |                |
|            |               | Average        | 29.0±14.2 B    | 32.9± 7.8 B    | 32.3±10.7 B    | 46.9±12.4 A    | 55.0±12.0 A    | 51.9±13.6 A    |                |
|            | Average       |                | 31.7±15.5 D    | 33.0± 7.2 CD   | 35.2± 9.4 C    | 48.1±15.1 B    | 53.0±11.1 A    | 49.5±13.8 AB   |                |
|            | acP           | Alfalfa        | LE2812         | 131.4±11.1 ABa | 131.4±21.3 ABa | 119.5±23.5 Ba  | 140.4±19.2 Aa  | 147.0±20.6 Aa  | 127.7±30.7 ABa |
| LE2368     |               |                | 130.2±22.3 Aa  | 127.4±15.2 Aa  | 128.4±14.4 Aa  | 136.6±23.6 Aa  | 143.6±26.1 Aa  | 99.2±18.8 Bb   |                |
| LE888      |               |                | 134.4±22.1 Aa  | 126.1± 7.7 Aa  | 125.6±12.1 Aa  | 141.5±30.9 Aa  | 137.4±16.1 Aa  | 130.1±26.6 Aa  |                |
| Average    |               |                | 132.0±17.5 AB  | 128.5±14.9 AB  | 124.1±16.3 AB  | 139.5±22.7 AB  | 142.7±19.7 A   | 120.8±27.6 B   |                |
| Red clover |               | LE1731         | 132.9±22.7 Aa  | 130.0±21.9 Aa  | 118.0± 7.6 Aa  | 127.6±10.7 Ab  | 136.3±25.5 Aa  | 134.4±27.2 Aab |                |
|            |               | LE1423         | 133.1±15.5 Aa  | 143.1±30.4 Aa  | 132.6±28.8 Aa  | 145.7±20.5 Aa  | 132.3± 5.2 Aa  | 139.6±36.4 Aa  |                |
|            |               | LE1937         | 127.9±21.1 ABa | 121.7±25.4 ABa | 113.2±12.6 Ba  | 142.3±25.5 Aab | 128.7±21.0 ABa | 125.5±25.9 ABb |                |
|            |               | Average        | 131.3±18.3 A   | 131.6±25.3 A   | 121.3±18.9 A   | 138.5±19.8 A   | 132.4±17.8 A   | 132.6±26.9 A   |                |
| Average    |               | 131.6±17.5 ABC | 130.1±20.6 BCD | 122.6±17.4 D   | 139.0±20.8 A   | 137.6±19.1 AB  | 126.7±27.2 CD  |                |                |
| DH         |               | Alfalfa        | LE2812         | 60.6±25.2 Aa   | 46.8±12.3 Aa   | 42.4± 7.1 Aa   | 76.8±44.4 Aa   | 83.2±24.0 Aa   | 53.5±14.8 Aa   |
|            | LE2368        |                | 42.8±21.7 Ba   | 44.9± 8.7 Ba   | 45.7±18.1 ABa  | 71.5±21.0 Aa   | 56.3±19.4 ABa  | 65.2±29.0 ABa  |                |
|            | LE888         |                | 55.8±43.6 Aa   | 46.6±20.8 Aa   | 55.5±28.3 Aa   | 63.0±25.9 Aa   | 71.3±15.4 Aa   | 77.2±31.8 Aa   |                |
|            | Average       |                | 53.1±29.7 ABC  | 46.1±13.4 C    | 48.4±19.6 BC   | 69.9±27.6 A    | 70.3±21.4 A    | 65.3±25.8 AB   |                |
|            | Red clover    | LE1731         | 32.1±11.3 Aa   | 54.7±11.5 Aa   | 46.5±26.3 Aa   | 67.9±30.9 Aa   | 56.8±21.1 Aa   | 70.2±22.0 Aa   |                |
|            |               | LE1423         | 69.8±23.7 Aa   | 54.3±16.9 Aa   | 56.8±15.7 Aa   | 52.1±15.9 Aa   | 65.0±43.1 Aa   | 64.8±23.7 Aa   |                |
|            |               | LE1937         | 40.5±10.1 BCa  | 37.3± 9.2 Ca   | 45.6±11.3 BCa  | 68.5±22.9 Aa   | 58.2±18.5 ABa  | 56.6±18.6 ABa  |                |
|            |               | Average        | 49.7±23.4 A    | 48.8±14.5 A    | 49.9±16.7 A    | 62.8±23.1 A    | 59.6±24.9 A    | 63.8±20.3 A    |                |
|            | Average       |                | 51.6±26.5 B    | 47.4±13.7 B    | 49.1±17.8 B    | 66.2±25.0 A    | 65.2±23.3 A    | 64.6±22.7 A    |                |

Table S2. Activities of acid and alkaline phosphatase (acP and aIP) and dehydrogenase (DH) in 0 to 20 cm soil depth of the six studied treatments (no P, TSP, ash, manure, compost and compost+TSP) with cultivation of selected accessions of alfalfa and red clover in autumn 2021. Letters in capital case indicate significant difference between treatments and letters in lower case indicate significant difference between accessions within same plant species (Duncan's new multiple range test with  $p < 0.05$ ). Mean  $\pm$  standard deviation ( $n = 4$ ).

| Enzyme | Plant species | Accession | Treatment           |                     |                      |                      |                      |                      |  |
|--------|---------------|-----------|---------------------|---------------------|----------------------|----------------------|----------------------|----------------------|--|
|        |               |           | No P                | TSP                 | Ash                  | Manure               | Compost              | Compost+TSP          |  |
| aIP    | Alfalfa       | LE2812    | 39.1 $\pm$ 17.7 ABa | 29.0 $\pm$ 9.9 Ba   | 36.1 $\pm$ 8.5 ABa   | 50.4 $\pm$ 9.0 Aa    | 43.0 $\pm$ 5.5 ABa   | 47.4 $\pm$ 14.9 Aa   |  |
|        |               | LE2368    | 29.3 $\pm$ 12.4 Ba  | 31.6 $\pm$ 6.0 ABa  | 40.0 $\pm$ 12.6 ABa  | 48.1 $\pm$ 25.3 Aa   | 38.7 $\pm$ 8.8 ABa   | 48.8 $\pm$ 9.6 Aa    |  |
|        |               | LE888     | 32.3 $\pm$ 12.9 BCa | 29.0 $\pm$ 8.4 Ca   | 38.4 $\pm$ 6.0 ABCa  | 44.8 $\pm$ 13.0 ABa  | 43.9 $\pm$ 10.6 ABa  | 46.5 $\pm$ 8.6 Aa    |  |
|        |               | Average   | 33.6 $\pm$ 13.8 BC  | 29.9 $\pm$ 7.6 C    | 38.2 $\pm$ 8.7 ABC   | 47.8 $\pm$ 15.8 A    | 41.8 $\pm$ 8.1 AB    | 47.6 $\pm$ 10.4 A    |  |
|        | Red clover    | LE1731    | 27.1 $\pm$ 11.5 Ca  | 29.1 $\pm$ 15.1 Ca  | 33.8 $\pm$ 13.2 BCa  | 38.9 $\pm$ 10.2 BCa  | 59.1 $\pm$ 11.8 Aa   | 48.1 $\pm$ 15.4 ABa  |  |
|        |               | LE1423    | 24.4 $\pm$ 4.9 Ba   | 26.7 $\pm$ 4.5 Ba   | 33.4 $\pm$ 8.6 Ba    | 48.9 $\pm$ 20.2 Aa   | 50.0 $\pm$ 16.0 Aa   | 51.2 $\pm$ 7.9 Aa    |  |
|        |               | LE1937    | 32.4 $\pm$ 16.9 ABa | 31.4 $\pm$ 13.3 Ba  | 38.5 $\pm$ 18.5 ABa  | 40.9 $\pm$ 8.9 ABa   | 46.4 $\pm$ 15.6 ABa  | 48.5 $\pm$ 9.7 Aa    |  |
|        |               | Average   | 28.0 $\pm$ 11.5 C   | 29.1 $\pm$ 10.9 C   | 35.3 $\pm$ 12.9 BC   | 42.9 $\pm$ 13.5 AB   | 51.8 $\pm$ 14.4 A    | 49.3 $\pm$ 10.5 A    |  |
|        | Average       |           | 30.8 $\pm$ 12.8 C   | 29.5 $\pm$ 9.2 C    | 36.7 $\pm$ 10.9 B    | 45.3 $\pm$ 14.6 A    | 46.8 $\pm$ 12.5 A    | 48.5 $\pm$ 10.2 A    |  |
|        |               |           |                     |                     |                      |                      |                      |                      |  |
| acP    | Alfalfa       | LE2812    | 108.7 $\pm$ 11.3 Aa | 104.8 $\pm$ 10.7 Aa | 93.5 $\pm$ 7.0 Aa    | 106.1 $\pm$ 18.1 Aa  | 105.6 $\pm$ 14.0 Aa  | 108.4 $\pm$ 24.1 Aa  |  |
|        |               | LE2368    | 104.6 $\pm$ 12.4 Aa | 108.2 $\pm$ 4.2 Aa  | 105.6 $\pm$ 19.3 Aa  | 113.2 $\pm$ 15.1 Aa  | 106.5 $\pm$ 16.0 Aa  | 113.6 $\pm$ 22.5 Aa  |  |
|        |               | LE888     | 99.2 $\pm$ 14.6 Ba  | 110.1 $\pm$ 7.5 ABa | 108.5 $\pm$ 11.2 ABa | 112.8 $\pm$ 12.6 ABa | 115.0 $\pm$ 11.1 ABa | 117.6 $\pm$ 25.6 Aa  |  |
|        |               | Average   | 104.2 $\pm$ 12.3 A  | 107.7 $\pm$ 7.5 A   | 102.5 $\pm$ 14.0 A   | 110.7 $\pm$ 14.4 A   | 109.0 $\pm$ 13.3 A   | 113.2 $\pm$ 22.1 A   |  |
|        | Red clover    | LE1731    | 121.8 $\pm$ 15.6 Aa | 104.7 $\pm$ 21.9 Ab | 105.7 $\pm$ 11.7 Aa  | 110.0 $\pm$ 22.7 Aa  | 115.8 $\pm$ 6.6 Aa   | 119.3 $\pm$ 19.1 Aa  |  |
|        |               | LE1423    | 123.4 $\pm$ 22.0 Aa | 133.6 $\pm$ 8.9 Aa  | 97.4 $\pm$ 16.2 Ba   | 118.6 $\pm$ 20.6 ABa | 112.0 $\pm$ 13.9 ABa | 114.9 $\pm$ 30.7 ABa |  |
|        |               | LE1937    | 99.5 $\pm$ 11.9 Ab  | 107.6 $\pm$ 18.6 Ab | 107.1 $\pm$ 22.8 Aa  | 118.0 $\pm$ 14.3 Aa  | 104.3 $\pm$ 8.3 Aa   | 115.0 $\pm$ 22.1 Aa  |  |
|        |               | Average   | 114.9 $\pm$ 19.1 A  | 115.3 $\pm$ 20.8 A  | 103.4 $\pm$ 16.5 A   | 115.5 $\pm$ 18.1 A   | 110.7 $\pm$ 10.4 A   | 116.4 $\pm$ 22.2 A   |  |
|        | Average       |           | 109.5 $\pm$ 16.7 AB | 111.5 $\pm$ 15.8 A  | 103.0 $\pm$ 14.9 B   | 113.1 $\pm$ 16.2 A   | 109.9 $\pm$ 11.7 AB  | 114.8 $\pm$ 21.8 A   |  |
|        |               |           |                     |                     |                      |                      |                      |                      |  |
| DH     | Alfalfa       | LE2812    | 73.9 $\pm$ 12.7 Aa  | 42.5 $\pm$ 10.0 Ba  | 44.0 $\pm$ 8.9 Bb    | 71.3 $\pm$ 20.6 Aa   | 57.7 $\pm$ 21.6 ABa  | 55.8 $\pm$ 11.2 ABa  |  |
|        |               | LE2368    | 54.7 $\pm$ 20.8 Bab | 58.8 $\pm$ 13.4 Ba  | 59.7 $\pm$ 4.9 Bba   | 65.9 $\pm$ 20.8 ABa  | 84.2 $\pm$ 18.7 Aa   | 52.2 $\pm$ 15.0 Ba   |  |
|        |               | LE888     | 39.1 $\pm$ 2.1 Cb   | 49.5 $\pm$ 11.3 BCa | 69.7 $\pm$ 11.7 ABCa | 61.8 $\pm$ 12.9 ABCa | 86.7 $\pm$ 5.0 Aa    | 70.8 $\pm$ 33.5 ABa  |  |
|        |               | Average   | 54.3 $\pm$ 19.3 B   | 50.3 $\pm$ 12.6 B   | 57.7 $\pm$ 14.3 AB   | 66.7 $\pm$ 17.5 AB   | 74.3 $\pm$ 21.1 A    | 59.6 $\pm$ 21.7 AB   |  |
|        | Red clover    | LE1731    | 66.5 $\pm$ 28.8 ABa | 53.9 $\pm$ 16.2 Bab | 56.5 $\pm$ 22.1 Ba   | 67.0 $\pm$ 21.2 ABa  | 95.5 $\pm$ 3.4 Aa    | 69.2 $\pm$ 8.7 ABa   |  |
|        |               | LE1423    | 56.6 $\pm$ 11.2 Aa  | 77.4 $\pm$ 32.1 Aa  | 42.2 $\pm$ 17.8 Aa   | 60.3 $\pm$ 20.3 Aa   | 70.7 $\pm$ 25.2 Aa   | 71.6 $\pm$ 14.1 Aa   |  |
|        |               | LE1937    | 41.7 $\pm$ 19.4 Ca  | 36.4 $\pm$ 9.3 Cb   | 48.8 $\pm$ 31.0 BAa  | 75.5 $\pm$ 28.9 ABa  | 74.3 $\pm$ 32.3 ABa  | 81.9 $\pm$ 26.4 Aa   |  |
|        |               | Average   | 54.8 $\pm$ 22.6 B   | 55.7 $\pm$ 24.9 B   | 48.5 $\pm$ 21.6 B    | 67.6 $\pm$ 22.5 AB   | 80.2 $\pm$ 24.3 A    | 74.7 $\pm$ 17.8 A    |  |
|        | Average       |           | 54.5 $\pm$ 20.5 B   | 52.7 $\pm$ 18.9 B   | 53.3 $\pm$ 18.3 B    | 67.2 $\pm$ 19.8 A    | 77.5 $\pm$ 22.6 A    | 66.8 $\pm$ 21.0 A    |  |
|        |               |           |                     |                     |                      |                      |                      |                      |  |
